# Supplementary material
Source: PubMed Central journal article supplement (PMC5902022)
Supplement: NIHMS956343-supplement-supplement_1.pdf [file NIHMS956343-supplement-supplement_1.pdf]

chikungunya sample, did clinical diagnosis and received local approvals. S.B. and J.B. performed molecular diagnostics and curated Zika and Chikungunya control material. N.D.G, S.T.P., I.M.C., K.G., G.O., R.R-S., T.F.R., N.A.B., J.J.G, M.G., S.H. and A.B. performed the experiments. All other authors tested the protocol and provided feedback. All authors have read and approved the contents of the manuscript.

### COMPETING FINANCIAL INTERESTS

J.Q., N.J.L. and J.T.S have received expenses and/or honoraria to speak at Oxford Nanopore Technologies and Illumina events. N.J.L., M.L. and J.T.S. have received free of charge reagents from Oxford Nanopore Technologies as members of the early access group. N.J.L. has received free of charge reagents from Oxford Nanopore Technologies in support of this project. N.J.L. and M.C. have received free of charge reagents from Oxford Nanopore Technologies to support previous work on Ebola virus. J.T.S. has received research funding from Oxford Nanopore Technologies.

### SUPPLEMENTARY INFORMATION

**Table 1** | Zika virus “ZikaAsian” scheme used by ZiBRA project generated by the Primal Scheme software <sup>15</sup>.

| Name              | Sequence                 | Pool |
|-------------------|--------------------------|------|
| ZIKA_400_1_LEFT   | GACAGTTCGAGTTTGAAGCGAAAG | 1    |
| ZIKA_400_1_RIGHT  | AGTATGCACTCCCACGTCTAGT   | 1    |
| ZIKA_400_2_LEFT   | AAGAAAGATCTGGCTGCCATGC   | 2    |
| ZIKA_400_2_RIGHT  | TGATTCCAACCAGGTTTGCAC    | 2    |
| ZIKA_400_3_LEFT   | AGATGACGTCGATTGTTGGTGC   | 1    |
| ZIKA_400_3_RIGHT  | TACGGTGACACAACCTCCATGT   | 1    |
| ZIKA_400_4_LEFT   | TCAGGTGCATAGGAGTCAGCAA   | 2    |
| ZIKA_400_4_RIGHT  | GGAGCCATGAACTGACAGCATT   | 2    |
| ZIKA_400_5_LEFT   | AGAACGTTAGTGGACAGAGGCT   | 1    |
| ZIKA_400_5_RIGHT  | TGTGCGTCCTTGAACCTACCA    | 1    |
| ZIKA_400_6_LEFT   | TTGATTGTGAACCGAGGACAGG   | 2    |
| ZIKA_400_6_RIGHT  | CCATCTGTCCCTGCGTACTGTA   | 2    |
| ZIKA_400_7_LEFT   | TGAAGGGCGTGCATACTCCTT    | 1    |
| ZIKA_400_7_RIGHT  | CGCCTCCAACCTGATCCAAAGTC  | 1    |
| ZIKA_400_8_LEFT   | GGGAGAAGAAGATCACCCACCA   | 2    |
| ZIKA_400_8_RIGHT  | TTGACTGCTGCTGCCAATCTAC   | 2    |
| ZIKA_400_9_LEFT   | GCCTTAGGGGGAGTGTGATCT    | 1    |
| ZIKA_400_9_RIGHT  | GAGTGGGCATTCTTCAGTGTG    | 1    |
| ZIKA_400_10_LEFT  | ACGGTCGTTGTGGGATCTGTAA   | 2    |
| ZIKA_400_10_RIGHT | GTGGGACTTTGGCCATTACAT    | 2    |

|                   |                         |   |
|-------------------|-------------------------|---|
| ZIKA_400_11_LEFT  | CAGCCGTTATTGGAACAGCTGT  | 1 |
| ZIKA_400_11_RIGHT | CCTGGGCCTTATCTCCATTCCA  | 1 |
| ZIKA_400_12_LEFT  | CACTAAGGTCCACGTGGAGGAA  | 2 |
| ZIKA_400_12_RIGHT | TATCAGCGCCAGATGAGCTACA  | 2 |
| ZIKA_400_13_LEFT  | TGGCAGTGCTGGTAGCTATGAT  | 1 |
| ZIKA_400_13_RIGHT | AGAGAGAGGAGCATAAACCCCC  | 1 |
| ZIKA_400_14_LEFT  | CAATGGTTTTGCTTTGGCCTGG  | 2 |
| ZIKA_400_14_RIGHT | TTTCCCATGTGATGTCACCTGC  | 2 |
| ZIKA_400_15_LEFT  | CCCTAGCGAAGTACTCACAGCT  | 1 |
| ZIKA_400_15_RIGHT | TACACTCCATCTGTGGTCTCCC  | 1 |
| ZIKA_400_16_LEFT  | GTGGCATGAACCCAATAGCCAT  | 2 |
| ZIKA_400_16_RIGHT | GCTCCAATGTCCCCATCCTTTG  | 2 |
| ZIKA_400_17_LEFT  | GTGGTCCATGGAAGCTAGATGC  | 1 |
| ZIKA_400_17_RIGHT | CCTTAAGGGCCTCCTCATT     | 1 |
| ZIKA_400_18_LEFT  | CTGTTGAGTGCTTCGAGCCTTC  | 2 |
| ZIKA_400_18_RIGHT | TGGTGAGTTGGAGTCCGGAAAT  | 2 |
| ZIKA_400_19_LEFT  | TATGGATGAGGCCCACTCACA   | 1 |
| ZIKA_400_19_RIGHT | GCCATCAAGTATGACCGGCTTT  | 1 |
| ZIKA_400_20_LEFT  | GGCTGGAAAACGGGTCATACAG  | 2 |
| ZIKA_400_20_RIGHT | CCTTTGCTCCGTCCTAAGCTTG  | 2 |
| ZIKA_400_21_LEFT  | AGAGACTGACGAAGACCATGCA  | 1 |
| ZIKA_400_21_RIGHT | CTCCAAAAGCCGCTCCTCTTTT  | 1 |
| ZIKA_400_22_LEFT  | TGGACCAGACACGGAGAGAAAA  | 2 |
| ZIKA_400_22_RIGHT | ATTCTGGCTGGCTCAATTTCCG  | 2 |
| ZIKA_400_23_LEFT  | CGTCTTGATGAGGAACAAGGGC  | 1 |
| ZIKA_400_23_RIGHT | AAGTGGTCACTGCATGTTGGAC  | 1 |
| ZIKA_400_24_LEFT  | TAATGGGAAGGAGAGAGGGG    | 2 |
| ZIKA_400_24_RIGHT | TCTCCTTGGGGGTCAATTGT    | 2 |
| ZIKA_400_25_LEFT  | CCCTGACCCTAATAGTGGCCAT  | 1 |
| ZIKA_400_25_RIGHT | CCTTCCATTTCTCTCCAGGGT   | 1 |
| ZIKA_400_26_LEFT  | ACTGGAACCTCTACAGCCAC    | 2 |
| ZIKA_400_26_RIGHT | ACCAGGGCCTCCTTTTGTGTAT  | 2 |
| ZIKA_400_27_LEFT  | AGTGCAAAGCTGAGATGGTTGG  | 1 |
| ZIKA_400_27_RIGHT | ATGTGTAGAGTTGCGGGAGAGT  | 1 |
| ZIKA_400_28_LEFT  | GGTGGGGGATTGGCTTGA AAAA | 2 |
| ZIKA_400_28_RIGHT | GGGCCTCATAGCTTCCATGGTA  | 2 |
| ZIKA_400_29_LEFT  | AGGATGTGAATCTCGGCTCTGG  | 1 |

|                   |                        |   |
|-------------------|------------------------|---|
| ZIKA_400_29_RIGHT | ATGCTGCATTGCTACGAACCTT | 1 |
| ZIKA_400_30_LEFT  | AAAAGTGGACACTAGGGTGCCA | 2 |
| ZIKA_400_30_RIGHT | TAATCCCAGCCCTTCAACACCA | 2 |
| ZIKA_400_31_LEFT  | ACAAGGGGAATTTGGAAAGGCC | 1 |
| ZIKA_400_31_RIGHT | CGTAAGTGACAACCTGTCCGCT | 1 |
| ZIKA_400_32_LEFT  | AAATGGAAAAAGGGCACAGGGC | 2 |
| ZIKA_400_32_RIGHT | TGTCCCATCCAGTTGAGGGTTT | 2 |
| ZIKA_400_33_LEFT  | CAAACGAATGGCAGTCAGTGGA | 1 |
| ZIKA_400_33_RIGHT | ATCCACACTCTGTTCCACACCA | 1 |
| ZIKA_400_34_LEFT  | ATTTCCACAGAAGGGACCTCCG | 2 |
| ZIKA_400_34_RIGHT | TGACTAGCAGGCCTGACAACAT | 2 |
| ZIKA_400_35_LEFT  | ACCACCTGGGCTGAGAACATTA | 1 |
| ZIKA_400_35_RIGHT | ACCACTAGTCCCTCTTCTGGAG | 1 |

**Table 2 |** Chikungunya virus “ChikAsiaECSA” 400 nt scheme

| Name               | Sequence                | Pool |
|--------------------|-------------------------|------|
| CHIK_400_1_LEFT_3  | CTTTTTGAAGGCCCTGCAACGT  | 1    |
| CHIK_400_1_RIGHT_3 | ACGGCCATCACCTCTTGTAAGT  | 1    |
| CHIK_400_2_LEFT_0  | TGTCGGACAGGAAGTACCACTG  | 2    |
| CHIK_400_2_RIGHT_0 | CTCATCCGCCCAATTTGTCGAG  | 2    |
| CHIK_400_3_LEFT_0  | GTA CTGGGTAGGGTTCGACACA | 1    |
| CHIK_400_3_RIGHT_0 | CACACGAAACCACTGTGTCACA  | 1    |
| CHIK_400_4_LEFT_4  | TCGGTGTTCATCTAAAGGGCA   | 2    |
| CHIK_400_4_RIGHT_4 | CTTCATGGTGTTCGTGTTCCGT  | 2    |
| CHIK_400_5_LEFT_0  | GGTGGGGCTGAACCAGAGAATA  | 1    |
| CHIK_400_5_RIGHT_0 | TACAAAGCTGTGAATTCGGCC   | 1    |
| CHIK_400_6_LEFT_4  | AAGCAGAAAACACACGGTCT    | 2    |
| CHIK_400_6_RIGHT_4 | GCGCCTCTCGGAGTCTTATTA   | 2    |
| CHIK_400_7_LEFT_0  | TACAGGCAGCACAGGAAGATGT  | 1    |
| CHIK_400_7_RIGHT_0 | TGGAAGTCTTCGGGCGAAATTG  | 1    |
| CHIK_400_8_LEFT_1  | GGAGCAAGTGAAGACGTGTACG  | 2    |
| CHIK_400_8_RIGHT_1 | TATATGGACAAGCGGGGCGAAT  | 2    |
| CHIK_400_9_LEFT_0  | TGCAAGAAGGAAGAAGCTGCAG  | 1    |
| CHIK_400_9_RIGHT_0 | AAGGCGATCAAGGCAAGTAACG  | 1    |
| CHIK_400_10_LEFT_0 | ATCTGCACGTACGGTTGATTCG  | 2    |

|                     |                          |   |
|---------------------|--------------------------|---|
| CHIK_400_10_RIGHT_0 | GGTTTTGTTGAGCCCGTAGTGT   | 2 |
| CHIK_400_11_LEFT_0  | GGCAAATGCGCACTACGAATG    | 1 |
| CHIK_400_11_RIGHT_0 | CCTTCCGTACGCGTTAGGAGTA   | 1 |
| CHIK_400_12_LEFT_1  | AGGAGTTTACGCAGTTAGGCAAA  | 2 |
| CHIK_400_12_RIGHT_1 | TTCATTCAAGGGCTACTTCGGGT  | 2 |
| CHIK_400_13_LEFT_0  | TGGTCCCTATCCTCGAAACAGC   | 1 |
| CHIK_400_13_RIGHT_0 | TCCTGGTAGTCACGCAGATCTG   | 1 |
| CHIK_400_14_LEFT_0  | TGAGGCAGCGTCCATTCTAGAA   | 2 |
| CHIK_400_14_RIGHT_0 | ATACCTACCAAGTGTGCGGGT    | 2 |
| CHIK_400_15_LEFT_4  | ACCTTGCACTGCCTACTAAGAGA  | 1 |
| CHIK_400_15_RIGHT_4 | ACATGGTGGTTTCAATGCTCTGG  | 1 |
| CHIK_400_16_LEFT_0  | TCAGAGCATACGGTTACGCAGA   | 2 |
| CHIK_400_16_RIGHT_0 | TTTGCGGTTCCTACTGGTGTTG   | 2 |
| CHIK_400_17_LEFT_0  | GACGGTGGTTGCAAGGCAGTAT   | 1 |
| CHIK_400_17_RIGHT_0 | TCCATGGCTGTAAAGAGGTGGT   | 1 |
| CHIK_400_18_LEFT_0  | ACCTCTCTCTCCACAGGTGTA    | 2 |
| CHIK_400_18_RIGHT_0 | GCCTCTATTTGCTTTGGCCACA   | 2 |
| CHIK_400_19_LEFT_0  | AAGGGACACGTTTTCCACAGAC   | 1 |
| CHIK_400_19_RIGHT_0 | GGAGCATTTGACTTTTTGCACTCC | 1 |
| CHIK_400_20_LEFT_0  | CGACTTCGCATGAACCATGTCA   | 2 |
| CHIK_400_20_RIGHT_0 | GTATGTATCGCCCCGTCGTCTA   | 2 |
| CHIK_400_21_LEFT_0  | AGTTTGATCTAAGCGCCGATGG   | 1 |
| CHIK_400_21_RIGHT_0 | AAATGTGATGGGGAACGTCTCG   | 1 |
| CHIK_400_22_LEFT_0  | CGCGTGACACAGCTATTCCTT    | 2 |
| CHIK_400_22_RIGHT_0 | TGGCGTACCGACTTCTGTTGTA   | 2 |
| CHIK_400_23_LEFT_0  | ACACGGACGACGAGTTATGACT   | 1 |
| CHIK_400_23_RIGHT_0 | GACAATCGGACGTTGATCGGAG   | 1 |
| CHIK_400_24_LEFT_0  | TAATGGCAGAGACCCCGAAAGT   | 2 |
| CHIK_400_24_RIGHT_0 | TGTGTTCTGGAATGGGGAAGGT   | 2 |
| CHIK_400_25_LEFT_0  | CGAGCGACATTCAATCCGTCOA   | 1 |
| CHIK_400_25_RIGHT_0 | CGGCAGCAGATTATGGGTCTT    | 1 |
| CHIK_400_26_LEFT_3  | GAAGAATTTGCTGCCAGCCCTA   | 2 |
| CHIK_400_26_RIGHT_3 | GTGCGGCTATAATGGCATCGAA   | 2 |
| CHIK_400_27_LEFT_0  | TTAGGAGATTGAACGCCGTCTT   | 1 |
| CHIK_400_27_RIGHT_0 | GTCAGACGATCTTCCAACACCC   | 1 |
| CHIK_400_28_LEFT_2  | GACAGGTACGCGCTTCAAGTTC   | 2 |
| CHIK_400_28_RIGHT_2 | CGCTAACGGTTTGCCAGTTTA    | 2 |

|                     |                         |   |
|---------------------|-------------------------|---|
| CHIK_400_29_LEFT_0  | AGCTCCCTACTTTTGTGGAGGG  | 1 |
| CHIK_400_29_RIGHT_0 | GACCGCGTACAAGGTTATGAC   | 1 |
| CHIK_400_30_LEFT_0  | TAATGTCCATGGCCACCTTTGC  | 2 |
| CHIK_400_30_RIGHT_0 | TATTCTTCCGATTCTTGCGCGG  | 2 |
| CHIK_400_31_LEFT_0  | CAACTTGCCCAGCTGATCTCAG  | 1 |
| CHIK_400_31_RIGHT_0 | ATCGATGGTCCCCTTACGTGT   | 1 |
| CHIK_400_32_LEFT_0  | TAAGGTAACAGGTTACGCGTGC  | 2 |
| CHIK_400_32_RIGHT_0 | TACGGGCTCCTTCATTAGCTCC  | 2 |
| CHIK_400_33_LEFT_2  | GACCGATCTTCGACAACAAGGG  | 1 |
| CHIK_400_33_RIGHT_2 | GCGTCGGGGAGAACATGTTAAG  | 1 |
| CHIK_400_34_LEFT_0  | GAGAAAACCTTGCGCATGCTTG  | 2 |
| CHIK_400_34_RIGHT_0 | CTGCTGGCATGTGATTGTCCAT  | 2 |
| CHIK_400_35_LEFT_0  | CCAGGTTTCTTGCAAATCGGA   | 1 |
| CHIK_400_35_RIGHT_0 | GTACGTGCTGCAAGGTAGTTCC  | 1 |
| CHIK_400_36_LEFT_1  | CATGTACGCACCCATTTACCA   | 2 |
| CHIK_400_36_RIGHT_1 | GGTCCCGAATTCAGCATTACG   | 2 |
| CHIK_400_37_LEFT_0  | CTGCAAGGTGCGATCAATGCCAT | 1 |
| CHIK_400_37_RIGHT_0 | TCATTGTTACCCACGTGACCT   | 1 |
| CHIK_400_38_LEFT_0  | AGTGGGTGACGCATAAGAAGGA  | 2 |
| CHIK_400_38_RIGHT_0 | TGGTGTCAGTTCGTACGGTGTA  | 2 |
| CHIK_400_39_LEFT_0  | ATACTCCTGTCGATGGTGGGTG  | 1 |
| CHIK_400_39_RIGHT_0 | CGGGATCACTGTTACGTGTTCCG | 1 |
| CHIK_400_40_LEFT_0  | TTTTTAGCCGTA CTGAGCGTCG | 2 |
| CHIK_400_40_RIGHT_0 | ATTTTCGGTGTCGCAGAAGCAG  | 2 |
| CHIK_400_41_LEFT_0  | GCGGTACAGCAGAGTGTAAGGA  | 1 |
| CHIK_400_41_RIGHT_0 | GTCGCCTTTGTACACCACGATT  | 1 |
| CHIK_400_42_LEFT_0  | CCATGCCGTACAGTTAAGGAC   | 2 |
| CHIK_400_42_RIGHT_0 | AGTTCATCGCTCTTACGGGTT   | 2 |
| CHIK_400_43_LEFT_0  | ATTGGCTAAAAGAACGAGGGGC  | 1 |
| CHIK_400_43_RIGHT_0 | TTCCGAATAGTGACGGCGTTA   | 1 |
| CHIK_400_44_LEFT_0  | GCACCCATTCTCAGACTTTGG   | 2 |
| CHIK_400_44_RIGHT_0 | CCTGCTAAACGACACGCATAGC  | 2 |
